# Supplementary material for: Room-temperature dielectric switching in a host–guest crown ether inclusion complex
Source: Royal Society of Chemistry journal article supplement (doi:10.1039/d1qi00959a), 2021-01-01
Supplement: d1qi00959a1.pdf [file d1qi00959a1.pdf]

## Supporting Information

### Room-Temperature Dielectric Switching in a Host-Guest Crown

#### Ether Inclusion

Fang-Fang Di,<sup>§</sup> Lin Zhou,<sup>§</sup> Wu-Jia Chen, Jun-Chao Liu, Hang Peng, Shu-Yu Tang, Hang Yu, Wei-Qiang Liao and Zhong-Xia Wang\*

*Ordered Matter Science Research Center, Nanchang University, Nanchang 330031, People's Republic of China.*

*E-mail: zhongxiawang@ncu.edu.cn*

<sup>§</sup>These authors contributed equally to this work.

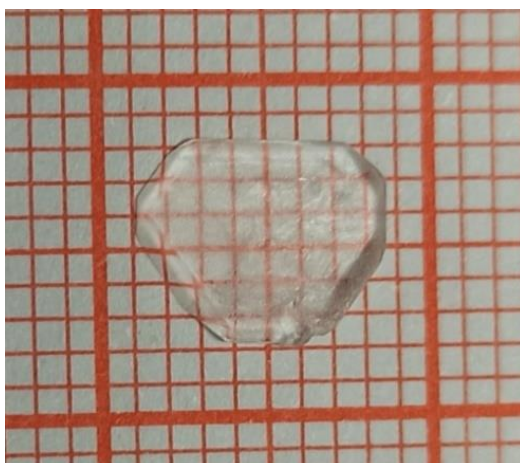

**Fig. S1** The crystal sample of **1**.

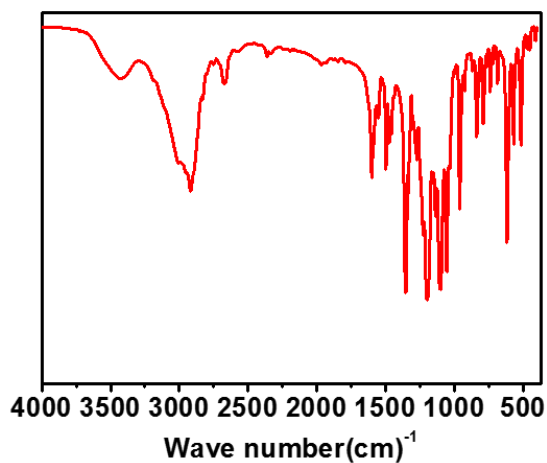

**Fig. S2** IR spectrum of **1** at room temperature.

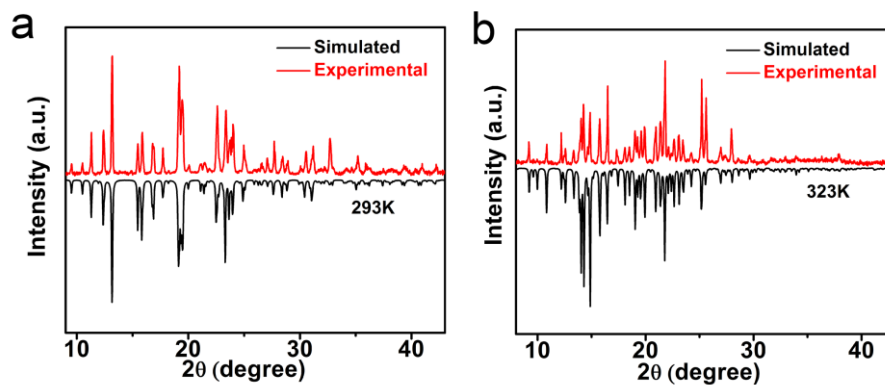

**Fig. S3** PXRD pattern of experiments and simulations of **1** at 293 K (a) and 323 K (b), respectively.

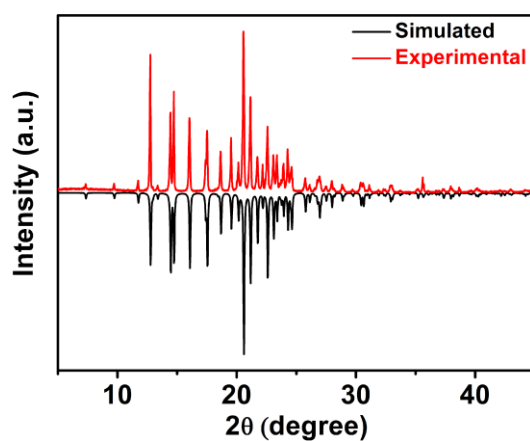

**Fig. S4** PXRD pattern of experiments and simulations of  $[(C_7H_{10}NO)(18\text{-crown-6})][PF_6]$  at 293 K (a) and 323 K (b), respectively.

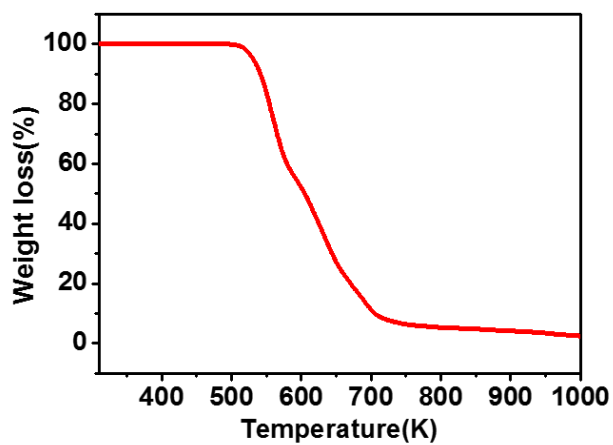

**Fig. S5** TGA data for **1**.

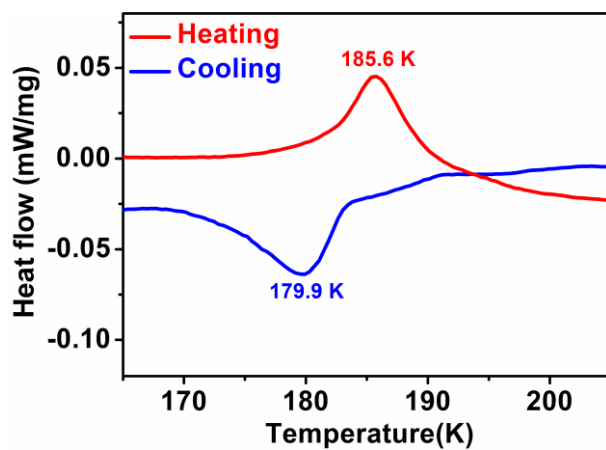

**Fig. S6** DSC curve of  $[(C_7H_{10}NO)(18\text{-crown-}6)][PF_6]$  measured in a heating–cooling cycle.

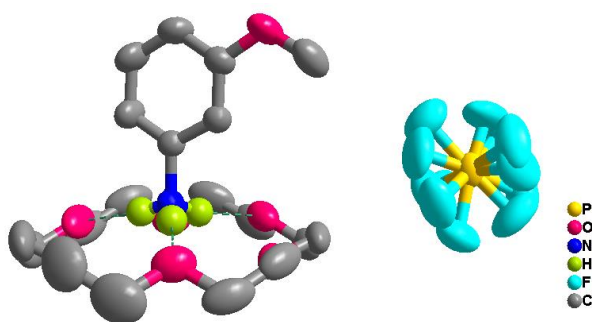

**Fig. S7** Molecular structures of  $[(C_7H_{10}NO)(18\text{-crown-}6)][PF_6]$  at 293 K. Part of H atoms were omitted for clarity.

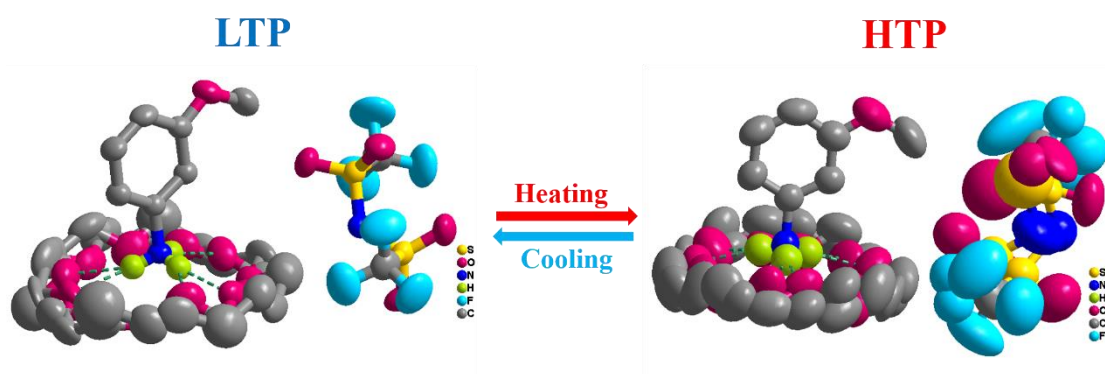

**Fig. S8** Molecular structures of **1** at 293 K (in LTP) and 323 K (in HTP). Part of H atoms were omitted for clarity.

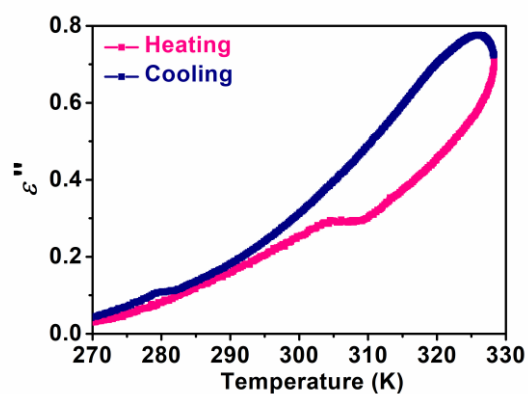

**Fig. S9** The dielectric imaginary of **1** measured under 1 MHz in a heating and cooling run.

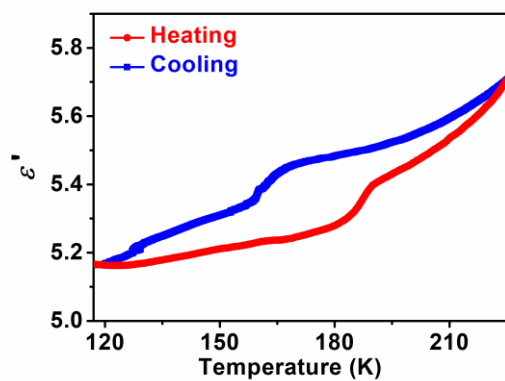

**Fig. S10** Temperature-dependence of the real part ( $\epsilon'$ ) of the polycrystalline sample for  $[(C_7H_{10}NO)(18\text{-crown-}6)][PF_6]$  at 1 MHz in a heating and cooling run.

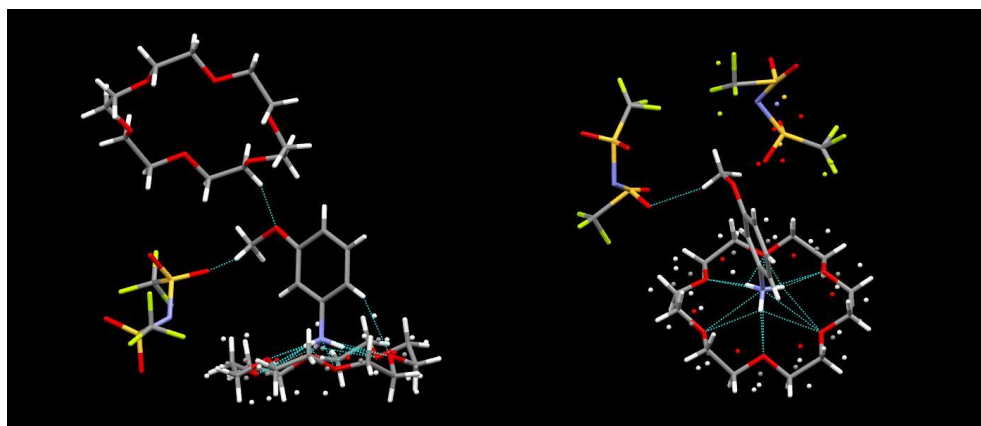

**Fig. S11** The short contacts detected between 3-methoxyanilinium cation and surrounding molecules at 293 K (a) and 323 K (b) respectively.

**Table. S1** Summary of the crystallographic data for **1** and [(3-methoxyanilinium)(18-crown-6)][PF<sub>6</sub>].

| Compound                                            | <b>1</b>                                                                                     | <b>1</b>                                                                                     | [(3-methoxyanilinium)(18-crown-6)][PF <sub>6</sub> ]             |
|-----------------------------------------------------|----------------------------------------------------------------------------------------------|----------------------------------------------------------------------------------------------|------------------------------------------------------------------|
| Formula                                             | C <sub>21</sub> H <sub>34</sub> F <sub>6</sub> N <sub>2</sub> O <sub>11</sub> S <sub>2</sub> | C <sub>21</sub> H <sub>34</sub> F <sub>6</sub> N <sub>2</sub> O <sub>11</sub> S <sub>2</sub> | C <sub>19</sub> H <sub>34</sub> F <sub>6</sub> NO <sub>7</sub> P |
| Formula Weight                                      | 668.62                                                                                       | 668.62                                                                                       | 533.44                                                           |
| Temperature                                         | 293 K                                                                                        | 323 K                                                                                        | 291 K                                                            |
| Crystal system                                      | Monoclinic                                                                                   | Monoclinic                                                                                   | Monoclinic                                                       |
| Space group                                         | <i>P</i> 2 <sub>1</sub> / <i>c</i>                                                           | <i>P</i> 2 <sub>1</sub> / <i>n</i>                                                           | <i>P</i> 2 <sub>1</sub> / <i>n</i>                               |
| <i>a</i> /Å                                         | 11.9353(16)                                                                                  | 13.3550(8)                                                                                   | 13.3720(2)                                                       |
| <i>b</i> /Å                                         | 16.8223(19)                                                                                  | 14.4913(6)                                                                                   | 13.8419(2)                                                       |
| <i>c</i> /Å                                         | 16.703(2)                                                                                    | 17.0721(10)                                                                                  | 15.1836(3)                                                       |
| <i>a</i> /deg                                       | 90                                                                                           | 90                                                                                           | 90                                                               |
| <i>β</i> /deg                                       | 110.336(15)                                                                                  | 107.240(7)                                                                                   | 116.112(2)                                                       |
| <i>γ</i> /deg                                       | 90                                                                                           | 90                                                                                           | 90                                                               |
| Volume/Å <sup>3</sup>                               | 3144.5(7)                                                                                    | 3155.5(3)                                                                                    | 2523.55(8)                                                       |
| <i>Z</i>                                            | 4                                                                                            | 4                                                                                            | 4                                                                |
| Density/g cm <sup>-3</sup>                          | 1.412                                                                                        | 1.407                                                                                        | 1.404                                                            |
| <i>R</i> <sub>1</sub> [ <i>I</i> > 2σ( <i>I</i> )]  | 0.0900                                                                                       | 0.1327                                                                                       | 0.0511                                                           |
| <i>wR</i> <sub>2</sub> [ <i>I</i> > 2σ( <i>I</i> )] | 0.2785                                                                                       | 0.2714                                                                                       | 0.1457                                                           |
| GOF                                                 | 1.012                                                                                        | 1.003                                                                                        | 1.069                                                            |

**Table. S2** Hydrogen bonds for **1** in LTP and HTP.

| <i>D</i> — <i>H</i> ··· <i>A</i> | <i>D</i> — <i>H</i> | <i>H</i> ··· <i>A</i> | <i>D</i> ··· <i>A</i> | <i>D</i> — <i>H</i> ··· <i>A</i> |
|----------------------------------|---------------------|-----------------------|-----------------------|----------------------------------|
| <b>LTP</b>                       |                     |                       |                       |                                  |
| N1—H2C···O7                      | 0.89                | 1.96                  | 2.836(6)              | 165.6                            |
| N1—H2C···O7A                     | 0.89                | 2.04                  | 2.867(9)              | 154.6                            |
| N1—H2E···O5                      | 0.89                | 2.01                  | 2.888(6)              | 167.4                            |
| N1—H2E···O5A                     | 0.89                | 2.02                  | 2.797(12)             | 145.8                            |
| N1—H2E···O6A                     | 0.89                | 2.20                  | 2.868(11)             | 131.4                            |
| <b>HTP</b>                       |                     |                       |                       |                                  |
| N1—H1A···O10                     | 0.89                | 1.91                  | 2.784(8)              | 164.8                            |
| N1—H1B···O13                     | 0.89                | 2.20                  | 2.837(18)             | 128.4                            |
| N1—H1C···O8                      | 0.89                | 1.97                  | 2.848(9)              | 166.6                            |

**Table. S3** Bond lengths [Å] and bond angles [°] for **1** at 293 K.

|       |          |        |          |
|-------|----------|--------|----------|
| S1-O1 | 1.425(3) | O10-C8 | 1.426(8) |
| S1-O2 | 1.429(3) | O7-C3  | 1.418(7) |
| S1-N2 | 1.568(3) | O7-C21 | 1.397(8) |
| S1-C1 | 1.825(5) | O8-C20 | 1.398(8) |
| S2-N2 | 1.573(3) | O8-C12 | 1.415(8) |
| S2-O4 | 1.422(3) | C7-C8  | 1.514(9) |
| S2-O3 | 1.425(3) | C5-C6  | 1.514(9) |
| S2-C2 | 1.819(5) | C9-C10 | 1.534(9) |

---

|             |            |             |           |
|-------------|------------|-------------|-----------|
| O11-C15     | 1.356(4)   | C11-C12     | 1.477(7)  |
| O11-C19     | 1.451(5)   | C20-C21     | 1.514(9)  |
| N1-C13      | 1.468(4)   | C3-C4       | 1.513(8)  |
| F1-C1       | 1.343(6)   | C6A-O5A     | 1.391(9)  |
| F5-C2       | 1.317(5)   | C6A-C5A     | 1.534(10) |
| F6-C2       | 1.336(6)   | C7A-O5A     | 1.423(10) |
| F4-C2       | 1.309(5)   | C7A-C8A     | 1.526(10) |
| C13-C14     | 1.395(5)   | C5A-O6A     | 1.422(10) |
| C13-C18     | 1.371(5)   | O6A-C4A     | 1.400(9)  |
| C14-C15     | 1.397(4)   | C4A-C3A     | 1.531(10) |
| F3-C1       | 1.315(6)   | C3A-O7A     | 1.416(10) |
| C15-C16     | 1.389(5)   | O7A-C21A    | 1.432(9)  |
| F2-C1       | 1.286(5)   | C21A-C20A   | 1.533(10) |
| C18-C17     | 1.388(5)   | C1A-O8A     | 1.393(10) |
| C16-C17     | 1.377(5)   | O8A-C12A    | 1.403(9)  |
| O6-C5       | 1.406(9)   | C12-C11A    | 1.512(10) |
| O6-C4       | 1.411(7)   | C11-O9A     | 1.416(10) |
| O5-C7       | 1.407(9)   | O9A-C10A    | 1.404(10) |
| O5-C6       | 1.430(7)   | C10A-C9A    | 1.526(10) |
| O9-C11      | 1.380(8)   | C9A-O10A    | 1.427(10) |
| O9-C10      | 1.424(7)   | O10-C8A     | 1.411(10) |
| O10-C9      | 1.367(7)   |             |           |
|             |            |             |           |
| O1-S1-O2    | 117.90(19) | F3-C1-F1    | 107.8(5)  |
| O1-S1-N2    | 108.54(17) | F2-C1-S1    | 111.6(4)  |
| O1-S1-C1    | 103.1(2)   | F2-C1-F1    | 108.3(4)  |
| O2-S1-N2    | 116.42(17) | F2-C1-F3    | 107.7(5)  |
| O2-S1-C1    | 105.1(2)   | C21-O7-C3   | 108.5(7)  |
| N2-S1-C1    | 103.8(2)   | C20-O8-C12  | 121.0(8)  |
| N2-S2-C2    | 103.5(2)   | O5-C7-C8    | 106.8(11) |
| O4-S2-N2    | 117.01(18) | O6-C5-C6    | 106.5(10) |
| O4-S2-O3    | 118.3(2)   | O10-C9-C10  | 109.6(6)  |
| O4-S2-C2    | 104.5(2)   | O9-C11-C12  | 109.8(9)  |
| O3-S2-N2    | 108.02(19) | O5-C6-C5    | 107.7(11) |
| O3-S2-C2    | 103.4(2)   | O9-C10-C9   | 108.4(6)  |
| C15-O11-C19 | 117.5(3)   | O8-C20-C21  | 116.5(10) |
| S1-N2-S2    | 127.0(2)   | O7-C3-C4    | 108.2(7)  |
| C14-C13-N1  | 118.0(3)   | O6-C4-C3    | 109.9(7)  |
| C18-C13-N1  | 119.9(3)   | O8-C12-C11  | 113.6(9)  |
| C18-C13-C14 | 122.1(3)   | O7-C21-C20  | 111.3(9)  |
| C13-C14-C15 | 118.0(3)   | O10-C8-C7   | 108.0(12) |
| O11-C15-C14 | 124.5(3)   | O5A-C6A-C5A | 101.7(13) |
| O11-C15-C16 | 115.5(3)   | O5A-C7A-C8A | 124(3)    |
| C16-C15-C14 | 120.1(3)   | C6A-O5A-C7A | 113.6(16) |

---

|             |          |               |           |
|-------------|----------|---------------|-----------|
| C13-C18-C17 | 119.1(3) | O6A-C5A-C6A   | 114.9(14) |
| C17-C16-C15 | 120.6(3) | C4A-O6A-C5A   | 108.1(12) |
| C16-C17-C18 | 120.2(3) | O6A-C4A-C3A   | 97.4(14)  |
| C5-O6-C4    | 111.4(8) | O7A-C3A-C4A   | 120.7(15) |
| F5-C2-S2    | 111.0(3) | C3A-O7A-C21A  | 126.7(13) |
| F5-C2-F6    | 107.4(4) | O7A-C21A-C20A | 113.0(18) |
| F6-C2-S2    | 112.3(3) | O8A-C20A-C21A | 97.1(16)  |
| F4-C2-S2    | 111.8(3) | C1A-O8A-C12A  | 106.0(11) |
| F4-C2-F5    | 108.4(4) | O8A-C12A-C11A | 111.9(16) |
| F4-C2-F6    | 105.6(4) | O9A-C11A-C12A | 113.1(17) |
| C7-O5-C6    | 107.2(8) | C10A-O9A-C11A | 102.7(14) |
| C11-O9-C10  | 111.5(8) | O9A-C10A-C9A  | 90.4(16)  |
| C9-O10-C8   | 109.9(8) | O10A-C9A-C10A | 142(2)    |
| F1-C1-S1    | 110.2(4) | C8A-O10A-C9A  | 124.2(19) |
| F3-C1-S1    | 111.2(3) | O10A-C8A-C7A  | 91(2)     |

**Table. S4** Bond lengths [ $\text{\AA}$ ] and bond angles [ $^\circ$ ] for **1** at 323 K.

|         |           |          |            |
|---------|-----------|----------|------------|
| S1-C1   | 1.890(12) | C20-C21  | 1.49(2)    |
| S1-N2   | 1.78(2)   | F4-F5A   | 1.57(4)    |
| S1-O1   | 1.283(9)  | C10-O5   | 1.413(9)   |
| S1-O2   | 1.393(9)  | C10-C11  | 1.538(10)  |
| S2-C2   | 1.679(13) | C14-C15  | 1.64(3)    |
| S2-O3   | 1.334(11) | N2-O2    | 1.82(4)    |
| S2-N2   | 1.78(2)   | C18-C19  | 1.555(10)  |
| S2-O4   | 1.291(13) | O5-C21   | 1.399(9)   |
| N1-C6   | 1.472(5)  | C11-O6   | 1.426(17)  |
| O17-C4  | 1.353(6)  | C13-C12  | 1.534(10)  |
| O17-C3  | 1.409(7)  | C12-O6   | 1.406(9)   |
| C6-C5   | 1.369(6)  | C6A-O16  | 1.44(3)    |
| C6-C7   | 1.359(6)  | C6A-C00O | 1.519(10)  |
| C5-C4   | 1.384(6)  | O16-C00V | 1.21(3)    |
| C4-C9   | 1.374(7)  | C00V-C8A | 1.48(3)    |
| C7-C8   | 1.393(7)  | C8A-O15  | 1.35(3)    |
| C8-C9   | 1.355(7)  | O15-C1A  | 1.15(3)    |
| O7-C14  | 1.390(9)  | C1A-C9A  | 1.34(3)    |
| O7-C13  | 1.405(9)  | C9A-O14  | 1.38(3)    |
| O10-C20 | 1.384(9)  | O14-C00Y | 1.02(2)    |
| O10-C19 | 1.418(9)  | C00Y-C2A | 1.5399(10) |
| O9-C17  | 1.416(10) | C2A-O13  | 1.38(3)    |
| O9-C18  | 1.408(10) | O13-C00  | 1.13(3)    |
| C2-F6   | 1.246(14) | C00-C22  | 1.48(3)    |
| C2-F5   | 1.304(16) | C22-O12  | 1.31(3)    |
| C2-F4   | 1.362(18) | O12-C4A  | 1.21(3)    |
| C2-S2A  | 1.913(15) | C4A-C10A | 1.41(3)    |

---

|             |            |               |            |
|-------------|------------|---------------|------------|
| C2-F4A      | 1.36(3)    | C10A-O11      | 1.41(2)    |
| C2-F5A      | 1.19(2)    | O11-C00O      | 1.404(10)  |
| O8-C16      | 1.419(10)  | N1A-S2A       | 1.652(11)  |
| O8-C15      | 1.408(9)   | N1A-O1A       | 1.4198(11) |
| C1-F1       | 1.386(12)  | N1A-S1A       | 1.850(14)  |
| C1-F3       | 1.279(13)  | S2A-O1A       | 1.62(2)    |
| C1-F2       | 1.213(14)  | S2A-O3A       | 1.356(14)  |
| C1-S1A      | 2.0993(11) | S2A-O4A       | 1.379(15)  |
| C1-F3A      | 1.373(15)  | O1A-S1A       | 1.393(16)  |
| C1-F1A      | 1.20(2)    | O1A-O2A       | 1.753(18)  |
| C17-C16     | 1.59(3)    | S1A-O2A       | 1.4198(11) |
|             |            |               |            |
| N2-S1-C1    | 84.9(10)   | O5-C10-C11    | 103.3(11)  |
| O1-S1-C1    | 110.5(7)   | O7-C14-C15    | 101.1(12)  |
| O1-S1-N2    | 164.4(11)  | O8-C16-C17    | 103.4(15)  |
| O1-S1-O2    | 104.0(8)   | S1-N2-S2      | 106.7(13)  |
| O2-S1-C1    | 103.2(6)   | S1-N2-O2      | 45.5(8)    |
| O2-S1-N2    | 68.8(15)   | S2-N2-O2      | 124.6(17)  |
| C2-S2-N2    | 143.8(11)  | O8-C15-C14    | 108.7(15)  |
| O3-S2-C2    | 104.4(12)  | O9-C18-C19    | 112.4(13)  |
| O3-S2-N2    | 105.7(17)  | C21-O5-C10    | 113.7(13)  |
| O4-S2-C2    | 105.7(9)   | O5-C21-C20    | 108.9(13)  |
| O4-S2-O3    | 106.3(7)   | O6-C11-C10    | 105.1(12)  |
| O4-S2-N2    | 84.7(9)    | O7-C13-C12    | 109.4(12)  |
| C4-O17-C3   | 117.9(5)   | O10-C19-C18   | 108.7(13)  |
| C5-C6-N1    | 117.9(4)   | O6-C12-C13    | 107.9(11)  |
| C7-C6-N1    | 119.2(4)   | C12-O6-C11    | 109.2(12)  |
| C7-C6-C5    | 122.9(4)   | O16-C6A-C00O  | 127(3)     |
| C6-C5-C4    | 118.5(5)   | C00V-O16-C6A  | 120(2)     |
| O17-C4-C5   | 124.1(5)   | O16-C00V-C8A  | 110(3)     |
| O17-C4-C9   | 116.1(6)   | O15-C8A-C00V  | 129(3)     |
| C9-C4-C5    | 119.8(5)   | C1A-O15-C8A   | 140(3)     |
| C6-C7-C8    | 117.5(5)   | O15-C1A-C9A   | 113(3)     |
| C9-C8-C7    | 121.0(5)   | C1A-C9A-O14   | 115(4)     |
| C8-C9-C4    | 120.4(5)   | C00Y-O14-C9A  | 123(3)     |
| C14-O7-C13  | 104.8(13)  | O14-C00Y-C2A  | 111(3)     |
| C20-O10-C19 | 111.3(11)  | O13-C2A-C00Y  | 130(2)     |
| C18-O9-C17  | 115.4(16)  | C00-O13-C2A   | 113.7(17)  |
| F6-C2-S2    | 101.1(11)  | O13-C00-C22   | 102(3)     |
| F6-C2-F5    | 101.0(15)  | O12-C22-C00   | 124(3)     |
| F6-C2-F4    | 82.7(12)   | C4A-O12-C22   | 130(3)     |
| F6-C2-S2A   | 128.7(10)  | O12-C4A-C10A  | 115(3)     |
| F6-C2-F4A   | 132(2)     | C4A-C10A-O11  | 106(2)     |
| F5-C2-S2A   | 111.5(10)  | C00O-O11-C10A | 109.1(18)  |

---



---

|             |           |              |           |
|-------------|-----------|--------------|-----------|
| F5-C2-F4A   | 95.0(16)  | O11-C00O-C6A | 91.8(6)   |
| F4-C2-S2    | 121.8(12) | S2A-N1A-S1A  | 94.6(7)   |
| F4A-C2-S2A  | 84.4(15)  | O1A-N1A-S2A  | 63.2(11)  |
| F5A-C2-S2   | 135.1(16) | O1A-N1A-S1A  | 48.2(8)   |
| F5A-C2-F6   | 122.9(17) | N1A-S2A-C2   | 96.7(7)   |
| F5A-C2-F4   | 76(2)     | O1A-S2A-C2   | 77.4(8)   |
| C15-O8-C16  | 102.3(17) | O1A-S2A-N1A  | 51.4(4)   |
| F1-C1-S1A   | 101.5(9)  | O3A-S2A-C2   | 105.7(8)  |
| F3-C1-F1    | 103.5(13) | O3A-S2A-N1A  | 123.6(8)  |
| F3-C1-S1A   | 130.6(12) | O3A-S2A-O1A  | 83.8(10)  |
| F2-C1-S1    | 113.6(10) | O3A-S2A-O4A  | 100.3(10) |
| F2-C1-F1    | 90.4(12)  | O4A-S2A-C2   | 108.6(15) |
| F2-C1-F3    | 135.4(14) | O4A-S2A-N1A  | 120.5(12) |
| F2-C1-S1A   | 85.7(9)   | O4A-S2A-O1A  | 171.2(14) |
| F2-C1-F3A   | 81.7(11)  | O2A-O1A-S1A  | 52.1(5)   |
| F2-C1-F1A   | 123.5(18) | S2A-O3A-O1A  | 53.8(7)   |
| F3A-C1-S1   | 98.1(9)   | N1A-S1A-C1   | 84.9(7)   |
| F1A-C1-S1   | 116.0(15) | O1A-S1A-C1   | 129.5(10) |
| F1A-C1-F3A  | 115.5(17) | O1A-S1A-N1A  | 49.5(4)   |
| O9-C17-C16  | 109.6(18) | O1A-S1A-O2A  | 77.1(10)  |
| O10-C20-C21 | 110.9(12) | O2A-S1A-C1   | 86.5(13)  |
| C2-F4-F6    | 45.7(7)   | O2A-S1A-N1A  | 93.0(13)  |
| C2-F4-F5A   | 47.2(12)  | C1-F3A-F2    | 45.1(7)   |
| F5A-F4-F6   | 80.8(14)  | O1A-O2A-S1A  | 50.8(8)   |

---
